# Supplementary material for: lncRNA and circRNA expression profiles in the hippocampus of Aβ25‑35‑induced AD mice treated with Tripterygium glycoside
Source: PubMed Central journal article supplement — Exp Ther Med. 2023 Jul 19;26(3):426. doi: 10.3892/etm.2023.12125 (PMC10433443; doi:10.3892/etm.2023.12125), 2023-07-19
Supplement: Supplementary_Data.pdf [file Supplementary_Data.pdf]

Table SI. Network stats for the protein-protein interaction network

| Node          | Identifier               | Node degree |
|---------------|--------------------------|-------------|
| 1700012B09Rik | 10090.ENSMUSP00000049826 | 2           |
| 1700024G13Rik | 10090.ENSMUSP00000098289 | 2           |
| AB124611      | 10090.ENSMUSP00000134056 | 0           |
| AW551984      | 10090.ENSMUSP00000042582 | 1           |
| Adcy7         | 10090.ENSMUSP00000130594 | 1           |
| Akr1c13       | 10090.ENSMUSP00000021634 | 0           |
| Akr1c18       | 10090.ENSMUSP00000021635 | 0           |
| Ankrd55       | 10090.ENSMUSP00000022275 | 1           |
| Ano1          | 10090.ENSMUSP00000112616 | 1           |
| Arc           | 10090.ENSMUSP00000023268 | 2           |
| Arhgap28      | 10090.ENSMUSP00000024840 | 0           |
| Arhgap36      | 10090.ENSMUSP00000110554 | 0           |
| Arhgef16      | 10090.ENSMUSP00000030898 | 0           |
| Aspa          | 10090.ENSMUSP00000021119 | 2           |
| Bcas1         | 10090.ENSMUSP00000013667 | 1           |
| Bglap3        | 10090.ENSMUSP00000074965 | 0           |
| Ccdc33        | 10090.ENSMUSP00000096279 | 0           |
| Cd38          | 10090.ENSMUSP00000030964 | 2           |
| Cd3d          | 10090.ENSMUSP00000034602 | 3           |
| Cd59a         | 10090.ENSMUSP00000048041 | 0           |
| Cd6           | 10090.ENSMUSP00000079172 | 1           |
| Cd83          | 10090.ENSMUSP00000015540 | 3           |
| Cdhr2         | 10090.ENSMUSP00000043596 | 0           |
| Chil1         | 10090.ENSMUSP00000080717 | 0           |
| Chrn4         | 10090.ENSMUSP00000034854 | 0           |
| Crct1         | 10090.ENSMUSP00000029521 | 0           |
| Ddit4l        | 10090.ENSMUSP00000058896 | 0           |
| Dlk1          | 10090.ENSMUSP00000105470 | 3           |
| Dusp6         | 10090.ENSMUSP00000020118 | 2           |
| Dynlrb2       | 10090.ENSMUSP00000077301 | 2           |
| Ear2          | 10090.ENSMUSP00000074386 | 1           |
| Ebf3          | 10090.ENSMUSP00000101724 | 2           |
| Egr2          | 10090.ENSMUSP00000041053 | 7           |
| Esm1          | 10090.ENSMUSP00000040187 | 1           |
| Exoc3l4       | 10090.ENSMUSP00000072438 | 1           |
| Fam183b       | 10090.ENSMUSP00000091708 | 3           |
| Fgf20         | 10090.ENSMUSP00000034014 | 0           |
| Fhdc1         | 10090.ENSMUSP00000088525 | 0           |
| Fkbp11        | 10090.ENSMUSP00000003445 | 0           |
| Fltp          | 10090.ENSMUSP00000027959 | 0           |
| Fosl2         | 10090.ENSMUSP00000031017 | 3           |
| Fst           | 10090.ENSMUSP00000022287 | 1           |
| Fut4          | 10090.ENSMUSP00000053027 | 1           |
| Gbp9          | 10090.ENSMUSP00000031238 | 1           |
| Gja10         | 10090.ENSMUSP00000061742 | 0           |
| Glr1          | 10090.ENSMUSP00000099777 | 2           |
| Gm1045        | 10090.ENSMUSP00000136951 | 0           |

|          |                          |   |
|----------|--------------------------|---|
| Gm1141   | 10090.ENSMUSP00000099034 | 0 |
| Gm14781  | 10090.ENSMUSP00000077562 | 0 |
| Gm4070   | 10090.ENSMUSP00000102377 | 2 |
| Gm5431   | 10090.ENSMUSP00000104835 | 2 |
| Gm7945   | 10090.ENSMUSP00000130156 | 0 |
| Gm8180   | 10090.ENSMUSP00000131109 | 0 |
| Gpr64    | 10090.ENSMUSP00000108019 | 0 |
| Gpx3     | 10090.ENSMUSP00000081011 | 4 |
| Grb10    | 10090.ENSMUSP00000091011 | 3 |
| Grin3b   | 10090.ENSMUSP00000048576 | 0 |
| Gstm7    | 10090.ENSMUSP00000004137 | 4 |
| Gstt2    | 10090.ENSMUSP00000046324 | 4 |
| Gstt3    | 10090.ENSMUSP00000001715 | 4 |
| Gzma     | 10090.ENSMUSP00000023897 | 1 |
| H2-Q7    | 10090.ENSMUSP00000071843 | 2 |
| Hoatz    | 10090.ENSMUSP00000126725 | 0 |
| Hoxa1    | 10090.ENSMUSP00000000964 | 0 |
| Hsd3b7   | 10090.ENSMUSP00000036245 | 0 |
| Hspb8    | 10090.ENSMUSP00000037007 | 0 |
| Htr2c    | 10090.ENSMUSP00000043936 | 1 |
| Ier5     | 10090.ENSMUSP00000056948 | 0 |
| Ifi2712a | 10090.ENSMUSP00000054698 | 3 |
| Ifi47    | 10090.ENSMUSP00000104825 | 4 |
| Insc     | 10090.ENSMUSP00000112682 | 0 |
| Itgb4    | 10090.ENSMUSP00000102068 | 2 |
| Kank4    | 10090.ENSMUSP00000099851 | 1 |
| Lhfp15   | 10090.ENSMUSP00000079598 | 1 |
| Lpo      | 10090.ENSMUSP00000099466 | 0 |
| Lypd3    | 10090.ENSMUSP00000079543 | 0 |
| Mab2114  | 10090.ENSMUSP00000035332 | 0 |
| Mag      | 10090.ENSMUSP00000139881 | 6 |
| Magel2   | 10090.ENSMUSP00000079265 | 3 |
| Mb       | 10090.ENSMUSP00000125995 | 1 |
| Mboat1   | 10090.ENSMUSP00000045441 | 2 |
| Mgst1    | 10090.ENSMUSP00000008684 | 4 |
| Mthfd21  | 10090.ENSMUSP00000071578 | 0 |
| Myrf     | 10090.ENSMUSP00000139601 | 4 |
| Nfatc2   | 10090.ENSMUSP00000074198 | 2 |
| Nkx2-2   | 10090.ENSMUSP00000069666 | 4 |
| Nr4a1    | 10090.ENSMUSP00000023779 | 4 |
| Olf1033  | 10090.ENSMUSP00000107216 | 0 |
| Olf222   | 10090.ENSMUSP00000071835 | 0 |
| Olf47    | 10090.ENSMUSP00000077204 | 0 |
| Onecut2  | 10090.ENSMUSP00000110798 | 1 |
| Ovol2    | 10090.ENSMUSP00000044026 | 0 |
| P2rx6    | 10090.ENSMUSP00000023441 | 0 |
| Pcbd1    | 10090.ENSMUSP00000020298 | 0 |
| Pcdh18   | 10090.ENSMUSP00000039245 | 1 |
| Pdlim2   | 10090.ENSMUSP00000116200 | 2 |

|            |                          |   |
|------------|--------------------------|---|
| Peg10      | 10090.ENSMUSP00000127306 | 4 |
| Pigk       | 10090.ENSMUSP00000045351 | 0 |
| Pirb       | 10090.ENSMUSP00000077546 | 3 |
| Plac8      | 10090.ENSMUSP00000031264 | 0 |
| Plekhh1    | 10090.ENSMUSP00000049460 | 0 |
| Plip       | 10090.ENSMUSP00000034227 | 3 |
| Pou4f1     | 10090.ENSMUSP00000060798 | 4 |
| Ppap2c     | 10090.ENSMUSP00000069670 | 1 |
| Ppbp       | 10090.ENSMUSP00000031319 | 0 |
| Psemb9     | 10090.ENSMUSP00000133499 | 3 |
| Resp18     | 10090.ENSMUSP00000043783 | 0 |
| Ribc1      | 10090.ENSMUSP00000026288 | 1 |
| Rimkla     | 10090.ENSMUSP00000058996 | 1 |
| Rnase1     | 10090.ENSMUSP00000079025 | 0 |
| Rnf138rt1  | 10090.ENSMUSP00000139291 | 0 |
| Saa3       | 10090.ENSMUSP0000006956  | 1 |
| Serpib8    | 10090.ENSMUSP00000108326 | 3 |
| Sirpb1c    | 10090.ENSMUSP00000061216 | 0 |
| Slc4a9     | 10090.ENSMUSP00000111358 | 0 |
| Slc6a9     | 10090.ENSMUSP00000030269 | 2 |
| Sncg       | 10090.ENSMUSP00000023826 | 1 |
| Sp100      | 10090.ENSMUSP00000066399 | 1 |
| Spaca9     | 10090.ENSMUSP00000121846 | 2 |
| Sparc      | 10090.ENSMUSP00000018737 | 1 |
| Sspo       | 10090.ENSMUSP00000131401 | 4 |
| St8sia6    | 10090.ENSMUSP00000003509 | 1 |
| Synj2      | 10090.ENSMUSP00000079164 | 0 |
| Sytl2      | 10090.ENSMUSP00000102829 | 0 |
| Tcf7l2     | 10090.ENSMUSP00000107283 | 4 |
| Tekt2      | 10090.ENSMUSP00000099676 | 1 |
| Tgtp1      | 10090.ENSMUSP00000069914 | 2 |
| Tinagl1    | 10090.ENSMUSP00000101620 | 1 |
| Tlr2       | 10090.ENSMUSP00000029623 | 5 |
| Tmem125    | 10090.ENSMUSP00000063157 | 1 |
| Trem14     | 10090.ENSMUSP00000118772 | 1 |
| Trim36     | 10090.ENSMUSP00000037978 | 0 |
| Trpm6      | 10090.ENSMUSP00000037443 | 0 |
| Vipr1      | 10090.ENSMUSP00000035115 | 0 |
| Wfdc15b    | 10090.ENSMUSP00000105001 | 0 |
| Zcchc12    | 10090.ENSMUSP00000110913 | 1 |
| Zpbp2      | 10090.ENSMUSP00000017339 | 0 |
| Zyg11a     | 10090.ENSMUSP00000038478 | 0 |
| mCG_117244 | 10090.ENSMUSP00000127953 | 0 |

---

Table SII. The top 10 enriched functional GO terms.

| Term ID    | Term description                      | List hit | List total | Pop hit | Pop total | Gene ratio | Bg ratio (pop hit/pop total) | Enrichment score | Gene symbols                                                                                                                                                                                                                                                                                                                                                                                                                          | P-value               | FDR bh   | Category           |
|------------|---------------------------------------|----------|------------|---------|-----------|------------|------------------------------|------------------|---------------------------------------------------------------------------------------------------------------------------------------------------------------------------------------------------------------------------------------------------------------------------------------------------------------------------------------------------------------------------------------------------------------------------------------|-----------------------|----------|--------------------|
| GO:0005576 | Extracellular region                  | 62       | 402        | 1,668   | 20,330    | 0.154229   | 0.082046                     | 1.87978          | Lyz2; Nmu; Apoc1; Sepp1; Ccl6; Ccl12; Ceacam10; Nsms; Trf; Ucn3; Prok1; Lbp; Zpbp2; Dhrrs11; Lgals3; Esm1; Wisp3; C4b; Cxcl1; Lcn12; Fgf20; Ccl5; Scgn; Sparc; Ccl2; Gpx3; Il1f9; Resp18; Cd59b; Txndc16; C3; Fst; Gnas; Sbp; Vash2; Serpinb1a; Saa3; Epyc; Folr1; Itih3; Ppy; Ntn5; Cxcl13; Bglap3; Casp4; Ceacam16; Sspo; Chil1; Cd40; Wfdc2; Nts; Milr1; Sfrp5; Adamts11; Ltf; Spp1; Wfdc15b; Col6a6; Rnasel; Cd59a; Gzma; Tinagl1 | 9.92x10 <sup>-7</sup> | 0.000259 | Cellular component |
| GO:0002376 | Immune system process                 | 25       | 396        | 425     | 20,209    | 0.063131   | 0.02103                      | 3.001931         | Oas2; Cd74; Cd1d1; Ifit2; Lbp; Gbp5; Lgals3; Cd3d; Psmb9; H2-Q7; Il1f9; Zbp1; Pirb; C3; Clec4d; Dcstamp; Casp4; Tlr2; Cd40; Ifitm3; Zc3hav1; Ltf; Oasl2; Padi4; Trem14                                                                                                                                                                                                                                                                | 1.18x10 <sup>-6</sup> | 0.001651 | Biological process |
| GO:0006954 | Inflammatory response                 | 21       | 396        | 343     | 20,209    | 0.05303    | 0.016973                     | 3.124459         | Ccl6; Fpr2; Ccl12; Gbp5; Il25; Cxcl1; Ccl5; Ccl2; Il1f9; Cd6; C3; Cxcl13; Tnfrsf25; Ppbp; Casp4; Chil1; Tlr2; Fpr3; Cd40; Lipa; Itgb6                                                                                                                                                                                                                                                                                                 | 4.61x10 <sup>-6</sup> | 0.002371 | Biological process |
| GO:0009615 | Response to virus                     | 8        | 396        | 52      | 20,209    | 0.020202   | 0.002573                     | 7.851204         | Oas2; Zc3hav1; Ccl5; Bcl3; Oasl2; Ifit2; Ifi2712a; Ifitm3                                                                                                                                                                                                                                                                                                                                                                             | 7.17x10 <sup>-6</sup> | 0.002371 | Biological process |
| GO:0071346 | Cellular response to interferon-gamma | 10       | 396        | 87      | 20,209    | 0.025253   | 0.004305                     | 5.865842         | Ccl5; Ccl2; H2-Q7; Ccl6; Ccl12; Evi; Stx11; Gbp9; Gbp5; Rab7b                                                                                                                                                                                                                                                                                                                                                                         | 7.79x10 <sup>-6</sup> | 0.002371 | Biological process |
| GO:0006955 | Immune response                       | 16       | 396        | 222     | 20,209    | 0.040404   | 0.010985                     | 3.678042         | Cd80; Oas2; Cd74; Cxcl1; Ccl5; Oasl2; Ccl2; Ccl6; Cxcl13; Ccl12; Il1f9; Tnfrsf25; Ppbp; Tinagl1; Cd40; Ccr10                                                                                                                                                                                                                                                                                                                          | 8.51x10 <sup>-6</sup> | 0.002371 | Biological process |
| GO:0008009 | Chemokine activity                    | 7        | 398        | 40      | 20,023    | 0.017588   | 0.001998                     | 8.804083         | Cxcl1; Ccl5; Ccl2; Ccl6; Ccl12; Cxcl13; Ppbp                                                                                                                                                                                                                                                                                                                                                                                          | 1.23x10 <sup>-5</sup> | 0.005651 | Molecular Function |
| GO:0070098 | Chemokine-mediated signaling pathway  | 7        | 396        | 43      | 20,209    | 0.017677   | 0.002128                     | 8.30767          | Cxcl1; Ccl5; Ccl2; Ccl6; Ccl12; Cxcl13; Ppbp                                                                                                                                                                                                                                                                                                                                                                                          | 1.84x10 <sup>-5</sup> | 0.004286 | Biological process |
| GO:0048245 | Eosinophil chemotaxis                 | 5        | 396        | 19      | 20,209    | 0.012626   | 0.00094                      | 13.42969         | Ccl5; Ccl2; Ccl6; Ccl12; Lgals3                                                                                                                                                                                                                                                                                                                                                                                                       | 2.61x10 <sup>-5</sup> | 0.005201 | Biological process |

GO, Gene Ontology; FDR, false discovery rate; Bg, background.

Table SIII. The top 10 enriched Kyoto Encyclopedia of Genes and Genomes pathways.

| Term ID       | Term description                          | List hit | List total | Pop hit | Pop total | Gene ratio | BgRatio  | Enrichment score | Gene IDs                                                                                                                       | Gene symbols                                                                                                        | P-value  | FDR bh   | Classification level                 |
|---------------|-------------------------------------------|----------|------------|---------|-----------|------------|----------|------------------|--------------------------------------------------------------------------------------------------------------------------------|---------------------------------------------------------------------------------------------------------------------|----------|----------|--------------------------------------|
| path:mmu04080 | Neuroactive ligand-receptor interaction   | 18       | 171        | 311     | 7,874     | 0.105263   | 0.039497 | 2.665087         | 15560; 14427; 108015; 22354; 56183; 14289; 19064; 83428; 94045; 14654; 94226; 12311; 170483; 14938; 18441; 14294; 18440; 67405 | Htr2c; Galr1; Chrn4; Vipr1; Nmu; Fpr2; Ppy; Ucn3; P2rx5; Glra1; S1pr5; Calcr; Grin3b; Gzma; P2ry1; Fpr3; P2rx6; Nts | 0.000133 | 0.030363 | Environmental Information Processing |
| path:mmu04978 | Mineral absorption                        | 6        | 171        | 44      | 7,874     | 0.035088   | 0.005588 | 6.279107         | 70358; 74051; 12309; 22041; 15203; 225997                                                                                      | Steap1; Steap2; S100g; Trf; Heph; Trpm6                                                                             | 0.000342 | 0.038998 | Organismal Systems                   |
| path:mmu05144 | Malaria                                   | 6        | 171        | 53      | 7,874     | 0.035088   | 0.006731 | 5.212843         | 20296; 20293; 15234; 17057; 24088; 21939                                                                                       | Ccl2; Ccl12; Hgf; Klrb1a; Tlr2; Cd40                                                                                | 0.000947 | 0.071218 | Human Diseases                       |
| path:mmu04970 | Salivary secretion                        | 7        | 171        | 76      | 7,874     | 0.040936   | 0.009652 | 4.241151         | 17105; 76113; 11513; 75600; 20535; 12494; 14683                                                                                | Lyz2; Lpo; Adcy7; Calml4; Slc4a2; Cd38; Gnas                                                                        | 0.001249 | 0.071218 | Organismal Systems                   |
| path:mmu05168 | Herpes simplex infection                  | 12       | 171        | 206     | 7,874     | 0.070175   | 0.026162 | 2.682337         | 246728; 15015; 16149; 20304; 20296; 15018; 20293; 667373; 12534; 20684; 24088; 12266                                           | Oas2; H2-Q4; Cd74; Ccl5; Ccl2; H2-Q7; Ccl12; Ifit1b1; Cdk1; Sp100; Tlr2; C3                                         | 0.001711 | 0.078021 | Human Diseases                       |
| path:mmu04060 | Cytokine-cytokine receptor interaction    | 13       | 171        | 264     | 7,874     | 0.076023   | 0.033528 | 2.267455         | 14825; 20304; 16186; 20296; 20305; 55985; 20293; 85030; 15234; 57349; 140806; 21939; 12777                                     | Cxcl1; Ccl5; Il2rg; Ccl2; Ccl6; Cxcl13; Ccl12; Tnfrsf25; Hgf; Ppbp; Il25; Cd40; Ccr10                               | 0.004825 | 0.1627   | Environmental Information Processing |
| path:mmu05150 | Staphylococcus aureus infection           | 5        | 171        | 52      | 7,874     | 0.02924    | 0.006604 | 4.427575         | 12266; 211924; 14289; 14294; 12268                                                                                             | C3; Dsg1c; Fpr2; Fpr3; C4b                                                                                          | 0.005192 | 0.1627   | Human Diseases                       |
| path:mmu05142 | Chagas disease (American trypanosomiasis) | 7        | 171        | 101     | 7,874     | 0.040936   | 0.012827 | 3.191361         | 20304; 12500; 20296; 20293; 24088; 12266; 14683                                                                                | Ccl5; Cd3d; Ccl2; Ccl12; Tlr2; C3; Gnas                                                                             | 0.006258 | 0.1627   | Human Diseases                       |
| path:mmu04062 | Chemokine signaling pathway               | 10       | 171        | 183     | 7,874     | 0.05848    | 0.023241 | 2.516218         | 14825; 20304; 11513; 20296; 20305; 55985; 20293; 57349; 66066; 12777                                                           | Cxcl1; Ccl5; Adcy7; Ccl2; Ccl6; Cxcl13; Ccl12; Ppbp; Gng11; Ccr10                                                   | 0.006422 | 0.1627   | Organismal Systems                   |
| path:mmu05146 | Amoebiasis                                | 7        | 171        | 105     | 7,874     | 0.040936   | 0.013335 | 3.069786         | 14683; 380839; 66222; 12479; 282663; 24088; 226421                                                                             | Gnas; Serpinb1c; Serpinb1a; Cd1d1; Serpinb1b; Tlr2; Rab7b                                                           | 0.007707 | 0.175715 | Human Diseases                       |
